# Supplementary material for: Early Plasmodium‐induced inflammation does not accelerate aging in mice
Source: PubMed Central journal article supplement (PMC6346666; doi:10.1111/eva.12718), 2018-10-17
Supplement: EVA-12-314-s001.pdf [file EVA-12-314-s001.pdf]

Table S1. Generalized linear mixed-effect model (with a Poisson distribution of errors) exploring the effect of reproductive bout and experimental group on litter size at birth.

| <b>Sources of variation (full model)</b> |                                | <i>Estimate ± SE</i> | <i>F</i> | <i>df</i> | <i>p</i> |
|------------------------------------------|--------------------------------|----------------------|----------|-----------|----------|
| Reproductive bout                        |                                | -0.767 ± 0.363       | 2.91     | 1,99      | 0.0913   |
| Treatment                                | un-manipulated                 | -1.629 ± 1.292       | 1.29     | 4,99      | 0.2780   |
|                                          | anti-IL-10R                    | -1.001 ± 1.033       |          |           |          |
|                                          | dead <i>P. yoelii</i>          | 0                    |          |           |          |
|                                          | <i>P. yoelii</i>               | 0.367 ± 1.489        |          |           |          |
|                                          | <i>P. yoelii</i> + anti-IL-10R | -3.772 ± 2.020       |          |           |          |
| Reproductive bout x Treatment            | un-manipulated                 | 0.514 ± 0.624        | 1.23     | 4,99      | 0.3027   |
|                                          | anti-IL-10R                    | 0.578 ± 0.477        |          |           |          |
|                                          | dead <i>P. yoelii</i>          | 0                    |          |           |          |
|                                          | <i>P. yoelii</i>               | -0.957 ± 1.036       |          |           |          |
|                                          | <i>P. yoelii</i> + anti-IL-10R | 1.289 ± 0.838        |          |           |          |
| <b>Random factor</b>                     |                                |                      |          |           |          |
| Mouse identity                           |                                | 1.153 ± 0.471        |          |           |          |

| <b>Sources of variation (model without the interaction)</b> |                                | <i>Estimate ± SE</i> | <i>F</i> | <i>df</i> | <i>p</i> |
|-------------------------------------------------------------|--------------------------------|----------------------|----------|-----------|----------|
| Reproductive bout                                           |                                | -0.448 ± 0.192       | 5.45     | 1,103     | 0.0215   |
| Treatment                                                   | un-manipulated                 | -0.767 ± 0.701       | 1.09     | 4,103     | 0.3676   |
|                                                             | anti-IL-10R                    | -0.020 ± 0.649       |          |           |          |
|                                                             | dead <i>P. yoelii</i>          | 0                    |          |           |          |
|                                                             | <i>P. yoelii</i>               | -0.919 ± 0.744       |          |           |          |
|                                                             | <i>P. yoelii</i> + anti-IL-10R | -1.292 ± 0.814       |          |           |          |
| <b>Random factor</b>                                        |                                |                      |          |           |          |
| Mouse identity                                              |                                | 1.153 ± 0.471        |          |           |          |

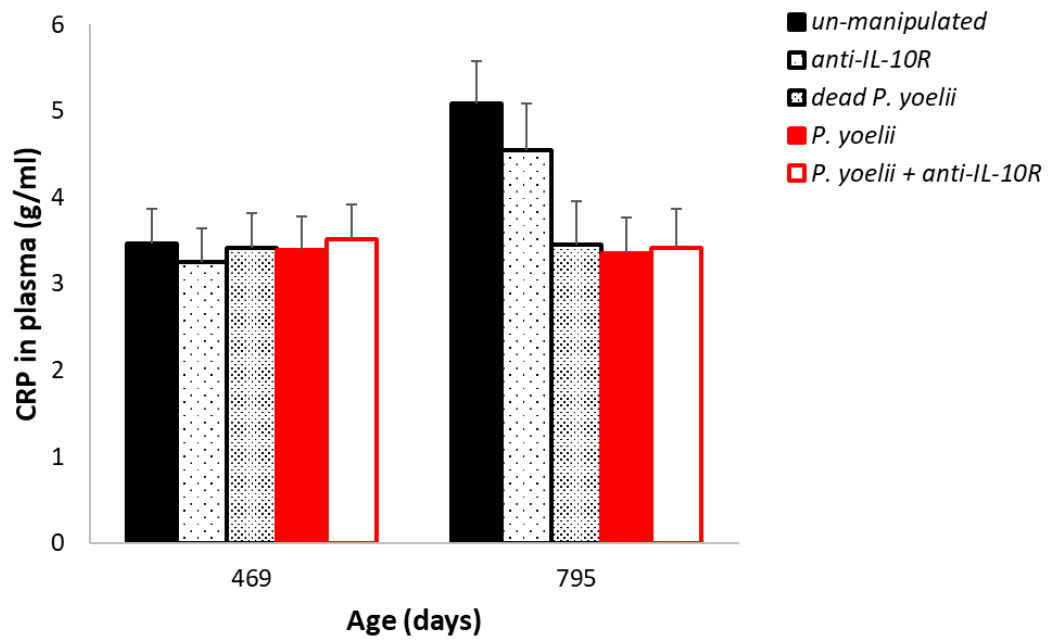

Figure S1. C-reactive protein in plasma for the five experimental groups when mice were 469 and 795 day old (means  $\pm$  SE).
